# Supplementary material
Source: publisher figshare collection journal article supplement (https://acs.figshare.com/ndownloader/files/6401484)
Supplement: Supplementary file 1 [file 6401484]

## Supporting Information

### Improving the Intracellular Drug Concentration in Lung Cancer Treatment through the Co-delivery of Doxorubicin and miR-519c Mediated by Porous PLGA Microparticle

Di Wu,<sup>†,§</sup> Chenhui Wang,<sup>‡,§</sup> Jiebing Yang,<sup>†,§</sup> Hao Wang,<sup>†</sup> Haobo Han,<sup>†</sup> Aijun Zhang,<sup>†</sup>

Yan Yang,<sup>\*,†</sup> and Quanshun Li<sup>\*,†</sup>

<sup>†</sup>Key Laboratory for Molecular Enzymology and Engineering of Ministry of Education,

School of Life Sciences, Jilin University, Changchun 130012, China

<sup>‡</sup>Innovative Drug Research Centre, School of Pharmacy, Chongqing University,

Chongqing 401331, China

\*Corresponding author.

Tel.: +86-431-85155381; Fax: +86-431-85155200.

E-mail: [quanshun@jlu.edu.cn](mailto:quanshun@jlu.edu.cn) (Q. Li); [yyan@jlu.edu.cn](mailto:yyan@jlu.edu.cn) (Y. Yang).

<sup>§</sup>D.W., C.W. and J.Y. contributed equally to the work.

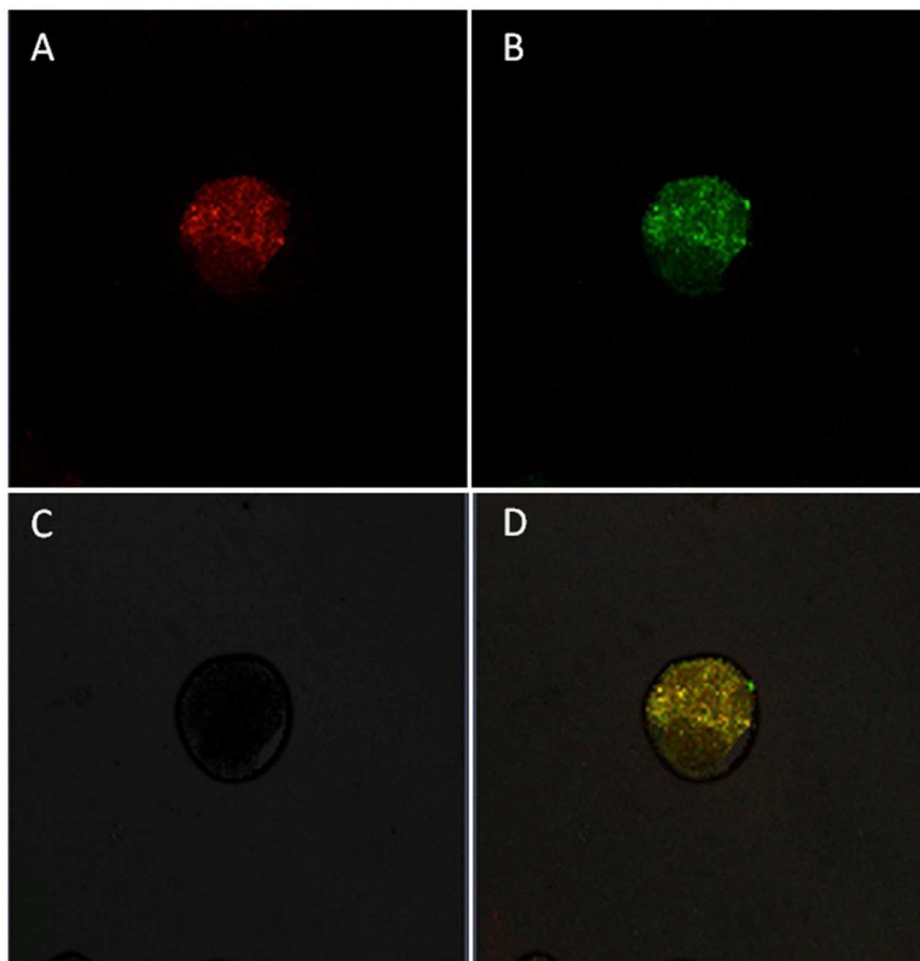

**Figure S1.** Confocal laser scanning microscopic analysis of the co-encapsulation of doxorubicin and miR-519c in porous PLGA microparticle MP-4. (A) Doxorubicin; (B) FITC-labeled PEI25K; (C) bright field; and (D) merge.

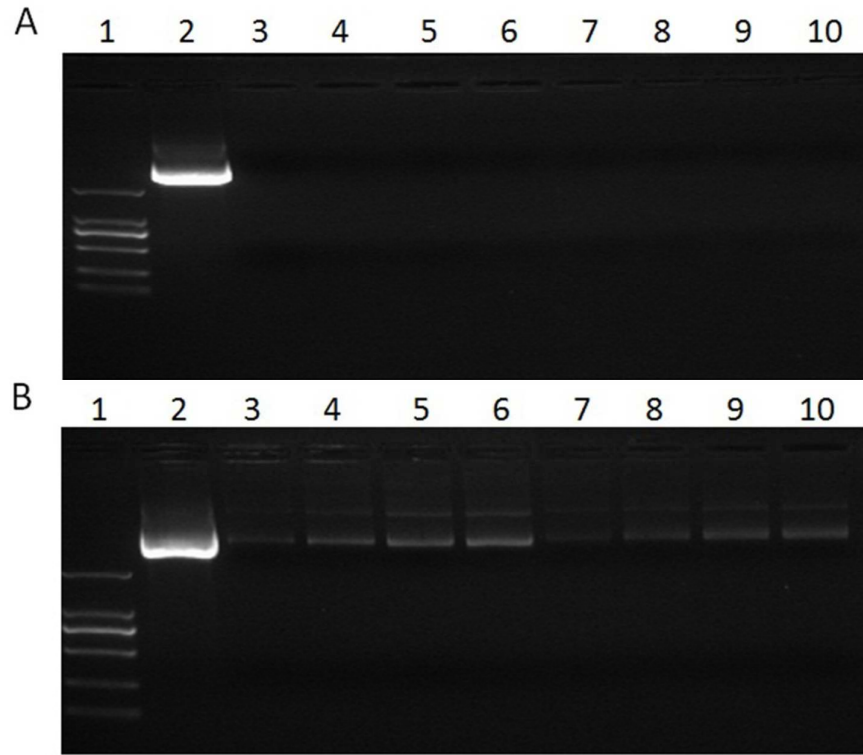

**Figure S2.** Agarose gel electrophoresis of PEI25K/miR-519c released from porous PLGA microparticles MP-2 and MP-4.

(A) No heparin treatment: lane 1, DL2000 maker; lane 2, naked plasmid pcDNA-miR-519c, lane 3-6, release supernatants from MP-2 at 1, 3, 5 and 7 days; lane 7-10, release supernatants from MP-4 at 1, 3, 5 and 7 days.

(B) Treatment with 4 mg/mL heparin: lane 1, DL2000 maker; lane 2, naked plasmid pcDNA-miR-519c, lane 3-6, release supernatants from MP-2 at 1, 3, 5 and 7 days; lane 7-10, release supernatants from MP-4 at 1, 3, 5 and 7 days.

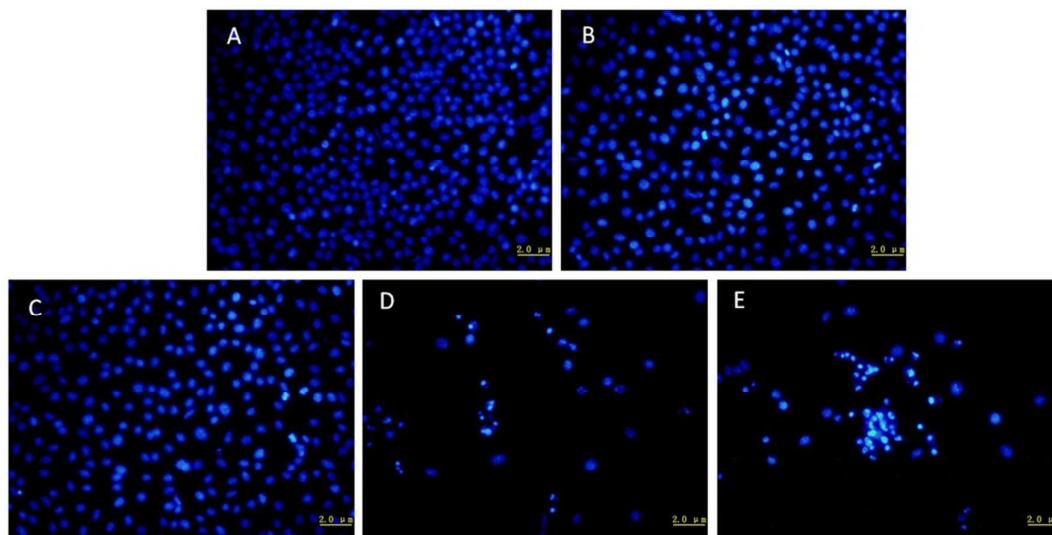

**Figure S3.** DAPI staining of A549 cells treated with the release supernatants at 7 days for 48 h. A: Control; B-E: treatment with release supernatants from MP-1, MP-2, MP-3 and MP-4, respectively.

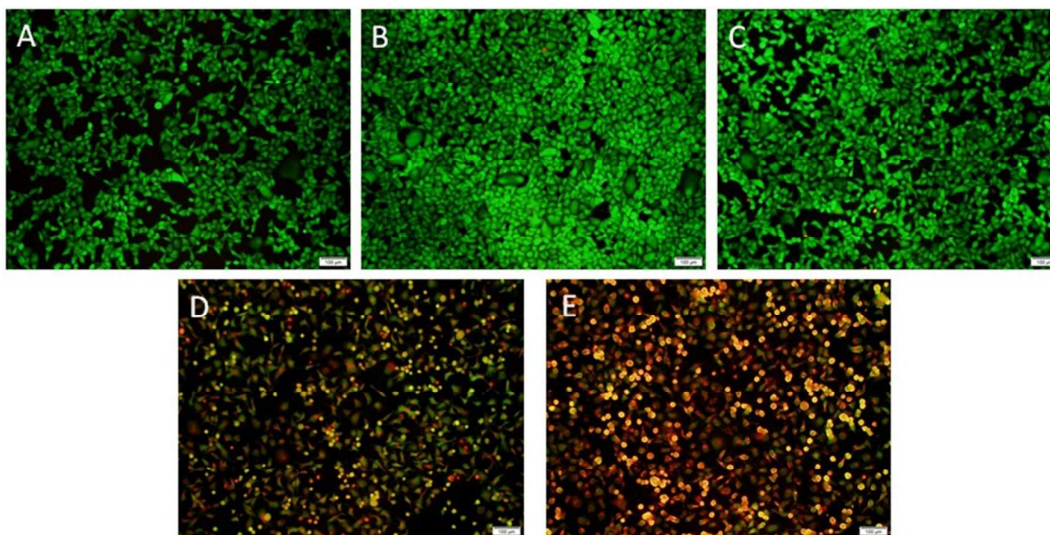

**Figure S4.** Live/Dead assays of A549 cells treated with the release supernatants at 7 days from porous PLGA microparticles for 24 h: (A) control; (B-E) treatment with release supernatants from MP-1, MP-2, MP-3 and MP-4, respectively. Living cells exhibited green fluorescence, and dead cells exhibited red fluorescence.

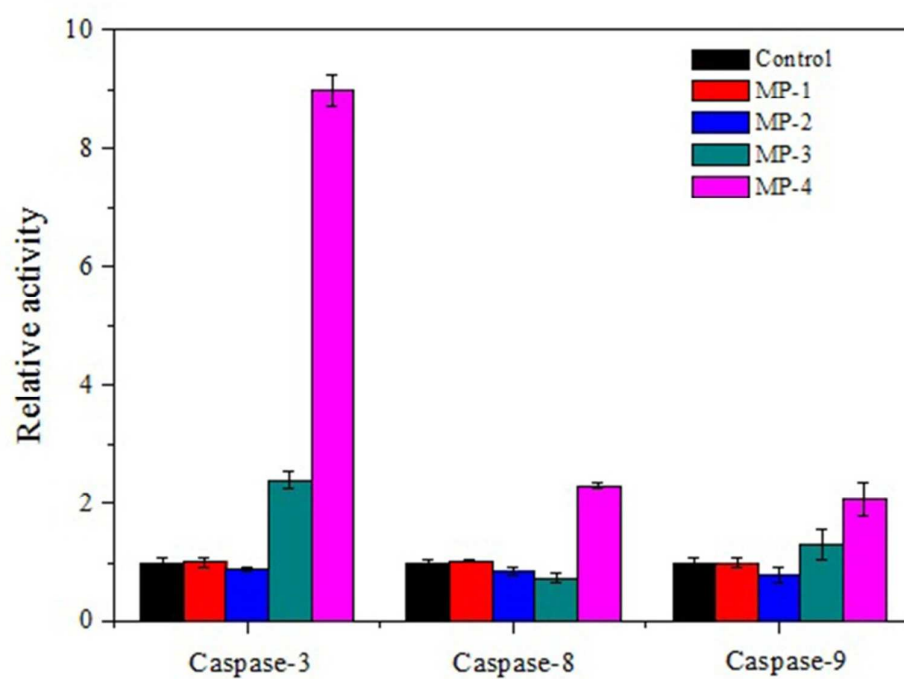

**Figure S5.** Relative activity of caspase-3, caspase-8 and caspase-9 in A549 cells treated with the release supernatants at 7 days from porous PLGA microparticles. The data were expressed as mean value  $\pm$  SD of three experiments.

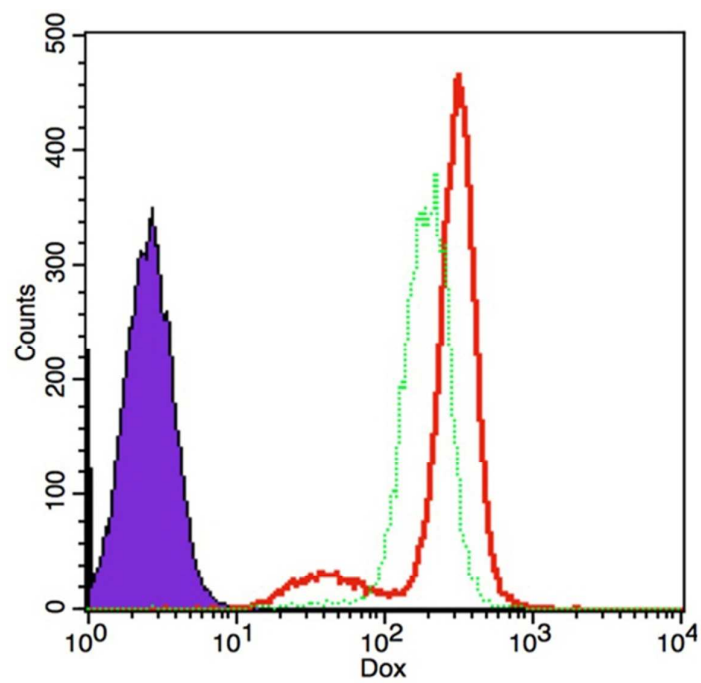

**Figure S6.** Intracellular fluorescence analysis of doxorubicin in A549 cells treated with the release supernatants at 7 days from MP-3 (green) and MP-4 (red) for 24 h.
